# Supplementary material for: Application of an Electronic Nose as a New Technology for Rapid Detection of Adulteration in Honey
Source: MDPI journal article supplement (doi:10.3390/app13084881), 2023-04-13
Supplement: s1 [file s1]

## Supplementary information

### Title: Application of an Electronic Nose as a New Technology for Rapid Detection of Adulteration in Honey

Wellington Belarmino Gonçalves <sup>1</sup>, Wanderson Sirley Reis Teixeira <sup>2</sup>, Evelyn Perez Cervantes <sup>3</sup>,  
Mateus de Souza Ribeiro Mioni <sup>2</sup>, Aryele Nunes da Cruz Encide Sampaio <sup>2</sup>,  
Otávio Augusto Martins <sup>2</sup>, Jonas Gruber <sup>1</sup> and Juliano Gonçalves Pereira <sup>2,\*</sup>

<sup>1</sup> Instituto de Química, Universidade de São Paulo, São Paulo 05508-000, SP, Brazil

<sup>2</sup> Faculdade de Medicina Veterinária e Zootecnia, Universidade Estadual Paulista “Júlio de Mesquita Filho” (UNESP), Botucatu 18610-000, SP, Brazil

<sup>3</sup> Instituto de Matemática e Estatística, Universidade de São Paulo, São Paulo 05508-090, SP, Brazil

\* Correspondence: juliano.pereira@unesp.br

Table S1: RRs data obtained by sensors during individual cycles.

| Sample | A1    | A2    | A3    | A4    | TH6 | 0.085 | 0.067 | 0.097 | 0.045 |
|--------|-------|-------|-------|-------|-----|-------|-------|-------|-------|
| TH1    | 0.071 | 0.053 | 0.054 | 0.048 | TH6 | 0.078 | 0.074 | 0.119 | 0.055 |
| TH1    | 0.057 | 0.045 | 0.041 | 0.041 | TH6 | 0.080 | 0.064 | 0.107 | 0.056 |
| TH1    | 0.066 | 0.051 | 0.048 | 0.043 | TH6 | 0.071 | 0.058 | 0.091 | 0.047 |
| TH1    | 0.080 | 0.067 | 0.064 | 0.054 | TH6 | 0.072 | 0.058 | 0.082 | 0.048 |
| TH1    | 0.090 | 0.081 | 0.081 | 0.065 | TH6 | 0.073 | 0.059 | 0.089 | 0.038 |
| TH1    | 0.084 | 0.074 | 0.073 | 0.062 | TH6 | 0.065 | 0.054 | 0.086 | 0.049 |
| TH1    | 0.075 | 0.063 | 0.062 | 0.052 | AH1 | 0.088 | 0.082 | 0.127 | 0.051 |
| TH2    | 0.050 | 0.044 | 0.043 | 0.037 | AH1 | 0.080 | 0.064 | 0.103 | 0.052 |
| TH2    | 0.046 | 0.038 | 0.035 | 0.037 | AH1 | 0.071 | 0.079 | 0.130 | 0.053 |
| TH2    | 0.075 | 0.064 | 0.062 | 0.054 | AH1 | 0.072 | 0.074 | 0.090 | 0.054 |
| TH2    | 0.062 | 0.051 | 0.044 | 0.046 | AH1 | 0.062 | 0.068 | 0.092 | 0.054 |
| TH2    | 0.054 | 0.048 | 0.042 | 0.040 | AH1 | 0.074 | 0.068 | 0.093 | 0.044 |
| TH2    | 0.049 | 0.043 | 0.040 | 0.037 | AH1 | 0.086 | 0.085 | 0.145 | 0.056 |
| TH2    | 0.068 | 0.071 | 0.061 | 0.052 | AH2 | 0.089 | 0.087 | 0.124 | 0.057 |
| TH3    | 0.069 | 0.060 | 0.041 | 0.039 | AH2 | 0.090 | 0.080 | 0.126 | 0.058 |
| TH3    | 0.082 | 0.091 | 0.074 | 0.061 | AH2 | 0.067 | 0.081 | 0.119 | 0.059 |
| TH3    | 0.060 | 0.064 | 0.047 | 0.046 | AH2 | 0.068 | 0.082 | 0.103 | 0.060 |
| TH3    | 0.047 | 0.057 | 0.047 | 0.038 | AH2 | 0.069 | 0.091 | 0.112 | 0.060 |
| TH3    | 0.058 | 0.066 | 0.044 | 0.048 | AH2 | 0.070 | 0.093 | 0.143 | 0.049 |
| TH3    | 0.054 | 0.062 | 0.044 | 0.044 | AH2 | 0.083 | 0.087 | 0.129 | 0.062 |
| TH3    | 0.040 | 0.049 | 0.039 | 0.041 | AH3 | 0.076 | 0.103 | 0.152 | 0.069 |
| TH4    | 0.049 | 0.040 | 0.048 | 0.043 | AH3 | 0.064 | 0.118 | 0.161 | 0.071 |
| TH4    | 0.057 | 0.040 | 0.048 | 0.051 | AH3 | 0.065 | 0.089 | 0.116 | 0.058 |
| TH4    | 0.051 | 0.041 | 0.046 | 0.052 | AH3 | 0.066 | 0.089 | 0.115 | 0.060 |
| TH4    | 0.045 | 0.041 | 0.043 | 0.040 | AH3 | 0.067 | 0.081 | 0.106 | 0.045 |
| TH4    | 0.046 | 0.042 | 0.046 | 0.048 | AH3 | 0.068 | 0.071 | 0.106 | 0.045 |
| TH4    | 0.054 | 0.052 | 0.081 | 0.050 | AH3 | 0.068 | 0.082 | 0.106 | 0.030 |
| TH4    | 0.048 | 0.038 | 0.049 | 0.036 | AH4 | 0.083 | 0.081 | 0.114 | 0.046 |
| TH5    | 0.077 | 0.069 | 0.083 | 0.062 | AH4 | 0.069 | 0.082 | 0.103 | 0.047 |
| TH5    | 0.086 | 0.060 | 0.090 | 0.047 | AH4 | 0.069 | 0.072 | 0.092 | 0.048 |
| TH5    | 0.065 | 0.056 | 0.071 | 0.048 | AH4 | 0.056 | 0.095 | 0.116 | 0.065 |
| TH5    | 0.081 | 0.066 | 0.093 | 0.048 | AH4 | 0.070 | 0.086 | 0.095 | 0.048 |
| TH5    | 0.091 | 0.067 | 0.105 | 0.058 | AH4 | 0.070 | 0.076 | 0.110 | 0.049 |
| TH5    | 0.085 | 0.063 | 0.091 | 0.050 | AH4 | 0.056 | 0.077 | 0.098 | 0.050 |
| TH5    | 0.087 | 0.059 | 0.084 | 0.042 | AH5 | 0.071 | 0.101 | 0.136 | 0.068 |

|     |       |       |       |       |
|-----|-------|-------|-------|-------|
| AH5 | 0.087 | 0.102 | 0.138 | 0.069 |
| AH5 | 0.072 | 0.090 | 0.122 | 0.052 |
| AH5 | 0.072 | 0.105 | 0.139 | 0.070 |
| AH5 | 0.072 | 0.107 | 0.145 | 0.071 |
| AH5 | 0.088 | 0.096 | 0.118 | 0.054 |
| AH5 | 0.074 | 0.125 | 0.153 | 0.055 |
| AH6 | 0.119 | 0.141 | 0.200 | 0.094 |
| AH6 | 0.119 | 0.160 | 0.209 | 0.096 |
| AH6 | 0.104 | 0.164 | 0.219 | 0.098 |
| AH6 | 0.121 | 0.188 | 0.250 | 0.100 |
| AH6 | 0.106 | 0.147 | 0.186 | 0.082 |
| AH6 | 0.091 | 0.147 | 0.183 | 0.061 |
| AH6 | 0.092 | 0.129 | 0.143 | 0.061 |
| AH7 | 0.092 | 0.141 | 0.185 | 0.061 |
| AH7 | 0.092 | 0.143 | 0.169 | 0.083 |
| AH7 | 0.092 | 0.129 | 0.154 | 0.062 |
| AH7 | 0.094 | 0.130 | 0.172 | 0.085 |
| AH7 | 0.094 | 0.134 | 0.159 | 0.064 |
| AH7 | 0.094 | 0.119 | 0.145 | 0.065 |
| AH7 | 0.094 | 0.121 | 0.164 | 0.089 |
| AH8 | 0.078 | 0.148 | 0.179 | 0.093 |
| AH8 | 0.078 | 0.117 | 0.145 | 0.095 |
| AH8 | 0.078 | 0.119 | 0.148 | 0.071 |
| AH8 | 0.078 | 0.103 | 0.132 | 0.073 |

|      |       |       |       |       |
|------|-------|-------|-------|-------|
| AH8  | 0.062 | 0.103 | 0.135 | 0.075 |
| AH8  | 0.079 | 0.105 | 0.491 | 0.075 |
| AH8  | 0.063 | 0.086 | 0.170 | 0.050 |
| AH9  | 0.081 | 0.102 | 0.125 | 0.050 |
| AH9  | 0.065 | 0.085 | 0.125 | 0.077 |
| AH9  | 0.065 | 0.086 | 0.127 | 0.103 |
| AH9  | 0.065 | 0.105 | 0.109 | 0.051 |
| AH9  | 0.082 | 0.088 | 0.109 | 0.053 |
| AH9  | 0.065 | 0.089 | 0.111 | 0.081 |
| AH9  | 0.065 | 0.091 | 0.113 | 0.054 |
| AH10 | 0.082 | 0.113 | 0.137 | 0.056 |
| AH10 | 0.065 | 0.115 | 0.120 | 0.086 |
| AH10 | 0.082 | 0.096 | 0.120 | 0.057 |
| AH10 | 0.066 | 0.118 | 0.120 | 0.057 |
| AH10 | 0.066 | 0.118 | 0.143 | 0.059 |
| AH10 | 0.066 | 0.100 | 0.125 | 0.059 |
| AH10 | 0.066 | 0.100 | 0.125 | 0.091 |
| AH11 | 0.082 | 0.128 | 0.156 | 0.094 |
| AH11 | 0.065 | 0.085 | 0.136 | 0.062 |
| AH11 | 0.066 | 0.106 | 0.109 | 0.062 |
| AH11 | 0.050 | 0.083 | 0.106 | 0.062 |
| AH11 | 0.051 | 0.082 | 0.080 | 0.062 |
| AH11 | 0.069 | 0.082 | 0.122 | 0.062 |
| AH11 | 0.068 | 0.083 | 0.122 | 0.065 |

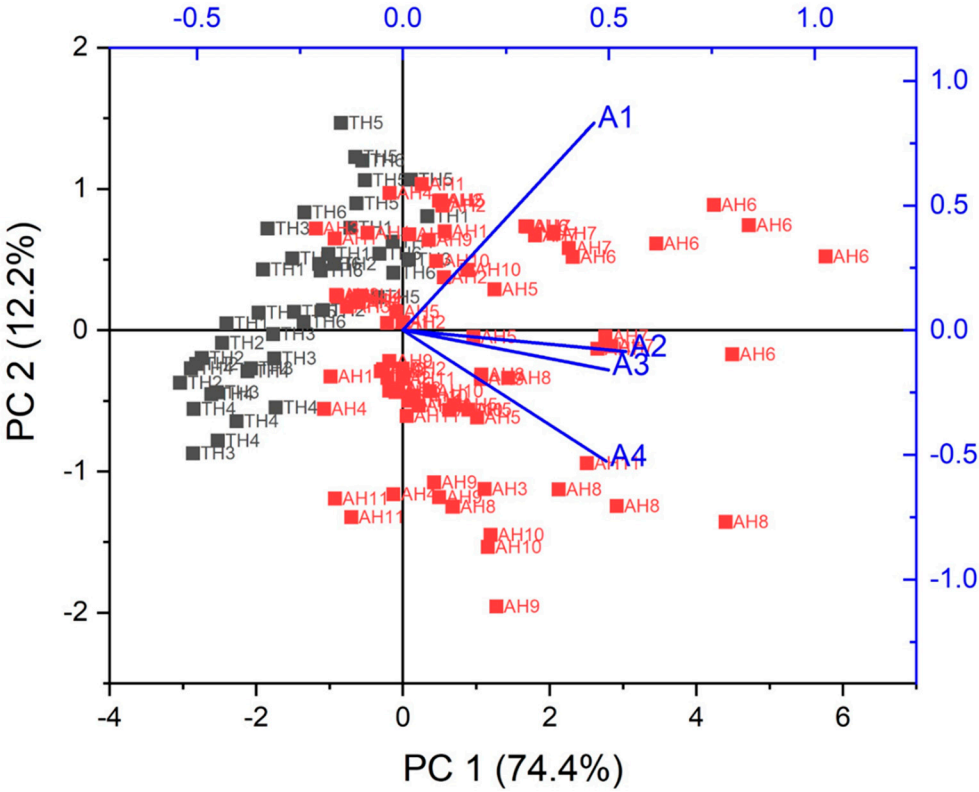

Figure S1: PCA biplot obtained for authentic (TH, ■) and adulterated honey (AH, ■) based on individual cycles RRs data.
